# Supplementary material for: Evaluation of a panel of tumor-specific differentially-methylated DNA regions in IRF4, IKZF1 and BCAT1 for blood-based detection of colorectal cancer
Source: PubMed Central journal article supplement (PMC7818774; doi:10.1186/s13148-020-00999-y), 2021-01-21
Supplement: 13148_2020_999_MOESM1_ESM.pdf [file 13148_2020_999_MOESM1_ESM.pdf]

1 **Additional File**

2

3

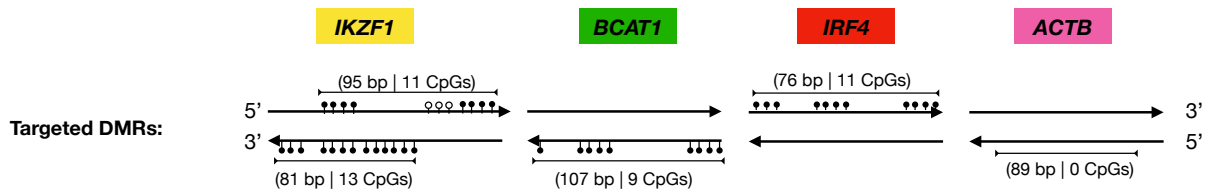

4

5

6 **Figure S1. The multi-panel real-time PCR assay.** (A) Schematic representation of

7 the investigated multi-panel qPCR assay, which targets differentially-methylated

8 regions (DMRs) in *BCAT1* ((Branched Chain Amino Acid Transaminase 1), *IKZF1*

9 (IKAROS Family Zinc Finger 1) and *IRF4* (Interferon Regulatory Factor 4) and a

10 control region in *ACTB* (beta-actin). The *IKZF1* PCR assay component detects the

11 targeted DMR on both strands (non-complementary subsequent to bisulphite

12 conversion). Partially methylation in the *IKZF1* DMR residing on the sense strand was

13 detectable by utilization of degenerate probes. The *IKZF1* probes were all labelled with

14 the same fluorophore, FAM. Detection of the other amplicon targets were reported

15 using probes labelled with HEX (*BCAT1*), Texas Red (*IRF4*) and Cy5 (*ACTB*).

16

17

18

19

20

21

22

1 **Table S1.** Positivity<sup>1</sup> by progression of cellular atypia (dysplasia in adenomas) and  
 2 degree of invasion (T stage in cancer) in cases without disseminated disease.

|                                                            | N   | Any gene         | BCAT1            | IKZF1            | IRF4             |
|------------------------------------------------------------|-----|------------------|------------------|------------------|------------------|
| <u>Count of Positives, n (% , 95%CI)</u>                   |     |                  |                  |                  |                  |
| <b>584 adenomas<sup>2</sup></b>                            |     |                  |                  |                  |                  |
| HGD                                                        | 35  | 9 (25.7, 14-42)  | 5 (14.3, 6-29)   | 6 (17.1, 4-30)   | 7 (20.0, 6-34)   |
| LGD                                                        | 549 | 65 (11.8, 9-15)  | 35 (6.4, 5-9)    | 32 (5.8, 4-8)    | 18 (3.3, 2-5)    |
| P-value <sup>3</sup>                                       |     | 0.017            | 0.072            | 0.009            | <0.0001          |
| <b>94 cancers without disseminated disease<sup>4</sup></b> |     |                  |                  |                  |                  |
| T1N0M0                                                     | 24  | 6 (25.0, 6-44)   | 1 (4.2, -5-13)   | 5 (20.8, 55-83)  | 2 (8.3, -4-20)   |
| T2N0M0                                                     | 17  | 10 (58.8, 33-85) | 7 (41.2, 15-67)  | 6 (35.3, 10-61)  | 5 (29.4, 5-54)   |
| T3N0M0 <sup>5</sup>                                        | 45  | 39 (86.7, 76-97) | 21 (46.7, 32-62) | 31 (68.9, 55-83) | 24 (53.3, 38-69) |
| T4N0M0                                                     | 8   | 8 (100, 63-100)  | 7 (87.5, 58-117) | 7 (87.5, 58-117) | 7 (87.5, 6-117)  |
| P-value <sup>6</sup>                                       |     | <0.0001          | <0.0001          | <0.0001          | <0.0001          |

3 <sup>1</sup> At least one PCR replicate positive for DNA methylation in any gene.

4 <sup>2</sup> The severity of dysplasia was available for 584 of 616 adenomas.

5 <sup>3</sup> Z-score population t-test.<sup>4</sup> T stage in cancer cases without disseminated disease.

6 <sup>5</sup> 57 Stage II (T3N0M0 and T4N0M0) in study cohort, but only 53 had full TNM  
 7 information.

8 <sup>6</sup> Ordinary one-way ANOVA against T1N0M0.

1 **Table S2. Test accuracy<sup>1</sup> for detection of advanced adenomas and adenomas**  
 2 **with high grade dysplasia based on all possible combinations of genes.**

| <b>Gene combination</b>                            | <b>TP</b> | <b>Sensitivity % (95%CI)</b> | <b>AUC (95%CI)</b>     | <b>TN</b> | <b>Specificity % (95%CI)</b> |
|----------------------------------------------------|-----------|------------------------------|------------------------|-----------|------------------------------|
| <b>Advanced adenoma (N = 337):</b>                 |           |                              |                        |           |                              |
| <i>BCAT1</i> only                                  | 29        | 8.6<br>(6.0-12.1)            | 0.516<br>(0.479-0.553) | 776       | 94.6<br>(92.9-96.0)          |
| <i>IRF4</i> only                                   | 20        | 5.9<br>(3.8-9.0)             | 0.503<br>(0.467-0.540) | 802       | 97.8<br>(96.6-98.6)          |
| <i>IKZF1</i> only                                  | 29        | 8.6<br>(6.0-12.1)            | 0.516<br>(0.479-0.553) | 785       | 95.7<br>(94.1-96.9)          |
| <i>BCAT1</i> and-or <i>IRF4</i>                    | 38        | 11.3<br>(8.3-15.1)           | 0.530<br>(0.492-0.567) | 761       | 92.8<br>(90.8-94.4)          |
| <i>IKZF1</i> and-or <i>IRF4</i>                    | 37        | 11.0<br>(8.0-14.8)           | 0.528<br>(0.491-0.565) | 773       | 94.3<br>(92.5-95.7)          |
| <i>BCAT1</i> and-or <i>IKZF1</i>                   | 47        | 14.0<br>(10.6-18.1)          | 0.543<br>(0.505-0.580) | 750       | 91.5<br>(89.4-93.2)          |
| Any of the 3 genes                                 | 53        | 15.7<br>(12.2-20.0)          | 0.552<br>(0.514-0.589) | 739       | 90.1<br>(87.9-92.0)          |
| <b>Application of <i>BCAT1</i> Replicate Rule:</b> |           |                              |                        |           |                              |
| Any of the 3 genes                                 | 37        | 11.0<br>(8.1-14.8)           | 0.526<br>(0.488-0.563) | 772       | 94.1<br>(92.3-95.6)          |
| <b>Adenoma with high-grade dysplasia (N = 35):</b> |           |                              |                        |           |                              |
| <i>BCAT1</i> only                                  | 5         | 14.3<br>(5.8-29.9)           | 0.545<br>(0.441-0.648) | 776       | 94.6<br>(92.9-96.0)          |
| <i>IRF4</i> only                                   | 7         | 20.0<br>(9.7-36.2)           | 0.573<br>(0.467-0.679) | 802       | 97.8<br>(96.6-98.6)          |
| <i>IKZF1</i> only                                  | 6         | 17.1<br>(7.7-33.1)           | 0.559<br>(0.454-0.664) | 785       | 95.7<br>(94.1-96.9)          |
| <i>BCAT1</i> and-or <i>IRF4</i>                    | 8         | 22.9<br>(11.8-39.3)          | 0.587<br>(0.480-0.694) | 761       | 92.8<br>(90.8-94.4)          |
| <i>IKZF1</i> and-or <i>IRF4</i>                    | 8         | 22.9<br>(11.8-39.3)          | 0.587<br>(0.480-0.694) | 773       | 94.3<br>(92.5-95.7)          |
| <i>BCAT1</i> and-or <i>IKZF1</i>                   | 7         | 20.0<br>(9.7-36.2)           | 0.573<br>(0.467-0.679) | 750       | 91.5<br>(89.4-93.2)          |
| Any of the 3 genes                                 | 9         | 25.7<br>(14.0-42.3)          | 0.602<br>(0.494-0.709) | 739       | 90.1<br>(87.9-92.0)          |
| <b>Application of <i>BCAT1</i> Replicate Rule:</b> |           |                              |                        |           |                              |
| Any of the 3 genes                                 | 8         | 22.9<br>(11.8-39.3)          | 0.587<br>(0.480-0.694) | 772       | 94.1<br>(92.3-95.6)          |

1 <sup>1</sup> The true- and false-positive rates in cases with advanced adenomas (n=337) or  
2 adenomas with high grade dysplasia (n=35) and cases without neoplasia (n = 820)  
3 were used for sensitivity (for indicated adenomas) and specificity (for neoplasia)  
4 estimates. TP: Counts of true positives. TN: Counts of true negatives. AUC, Area  
5 Under Curve.
